# Supplementary material for: Occurrence and significance of Omicron BA.1 infection followed by BA.2 reinfection
Source: bioRxiv or medRxiv preprint supplement (doi:10.1101/2022.02.19.22271112), 2022-02-21
Supplement: Supplementary file [file media-2.pdf]

Position 55

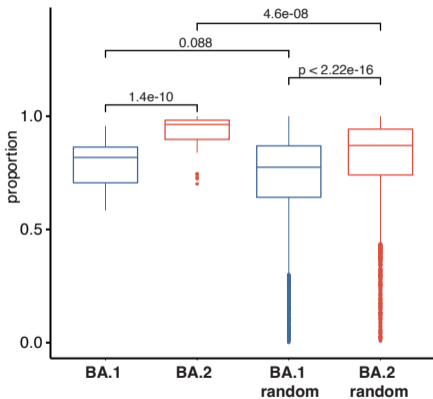

Position 21552

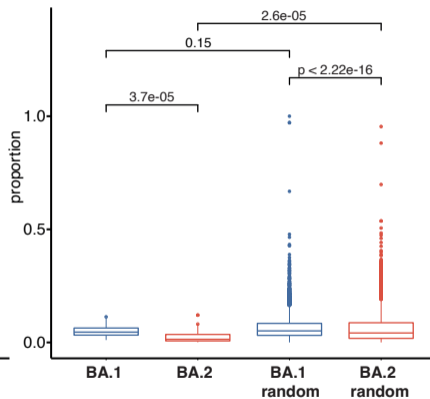

Position 28256

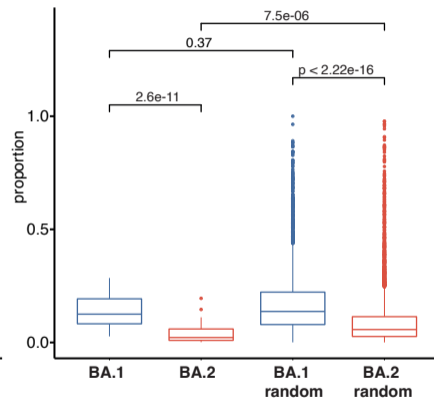

Lineage

BA.1

BA.2
